# Supplementary material for: Strong-field effects in the photo-induced dissociation of the hydrogen molecule on a silver nanoshell
Source: Royal Society of Chemistry journal article supplement (doi:10.1039/d4sc04110k), 2024-01-01
Supplement: d4sc04110k1.pdf [file d4sc04110k1.pdf]

# Supplementary Information: Strong-field effects in the photo-induced dissociation of the hydrogen molecule on a silver nanoshell

Natalia E. Koval,<sup>\*a</sup> J. Iñaki Juaristi,<sup>bac</sup> and Maite Alducin<sup>ac</sup>

\* natalia.koval@ehu.es

<sup>a</sup> Centro de Física de Materiales CFM/MPC (CSIC-UPV/EHU), Paseo Manuel de Lardizabal 5, 20018 Donostia-San Sebastián, Spain; E-mail: natalia.koval@ehu.es

<sup>b</sup> Departamento de Polímeros y Materiales Avanzados: Física, Química y Tecnología, Facultad de Química (UPV/EHU), Apartado 1072, 20080 Donostia-San Sebastián, Spain

<sup>c</sup> Donostia International Physics Center (DIPC), Paseo Manuel de Lardizabal 4, 20018 Donostia-San Sebastián, Spain

## 1 Additional figures

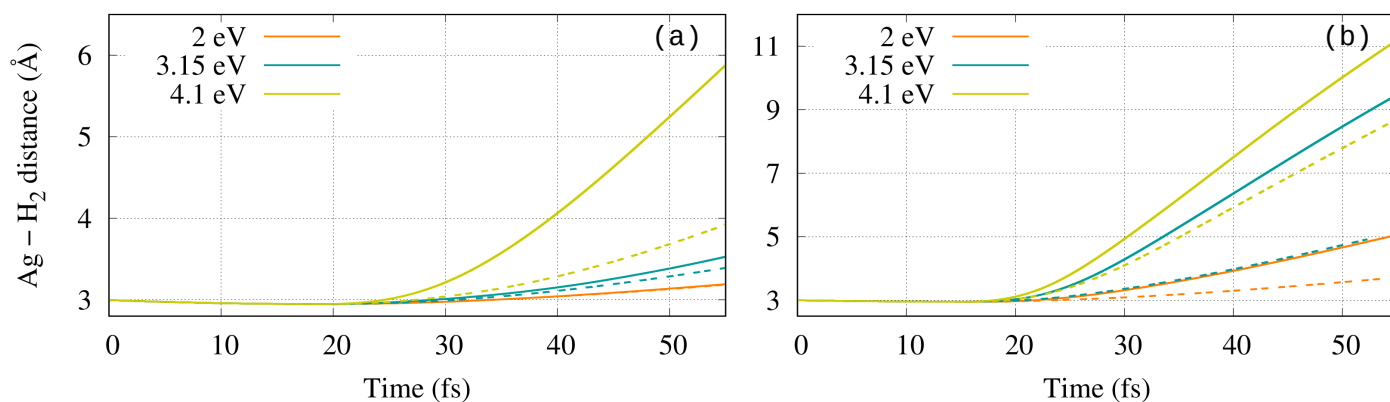

**Figure S1** Distance from the top Ag atom to the center of the H<sub>2</sub> molecule as a function of time: (a)  $I_{\max} = 2 \times 10^{13}$  W/cm<sup>2</sup>, (b)  $I_{\max} = 1 \times 10^{14}$  W/cm<sup>2</sup>. Solid (dashed) lines correspond to the calculations with (without) ghost atoms.

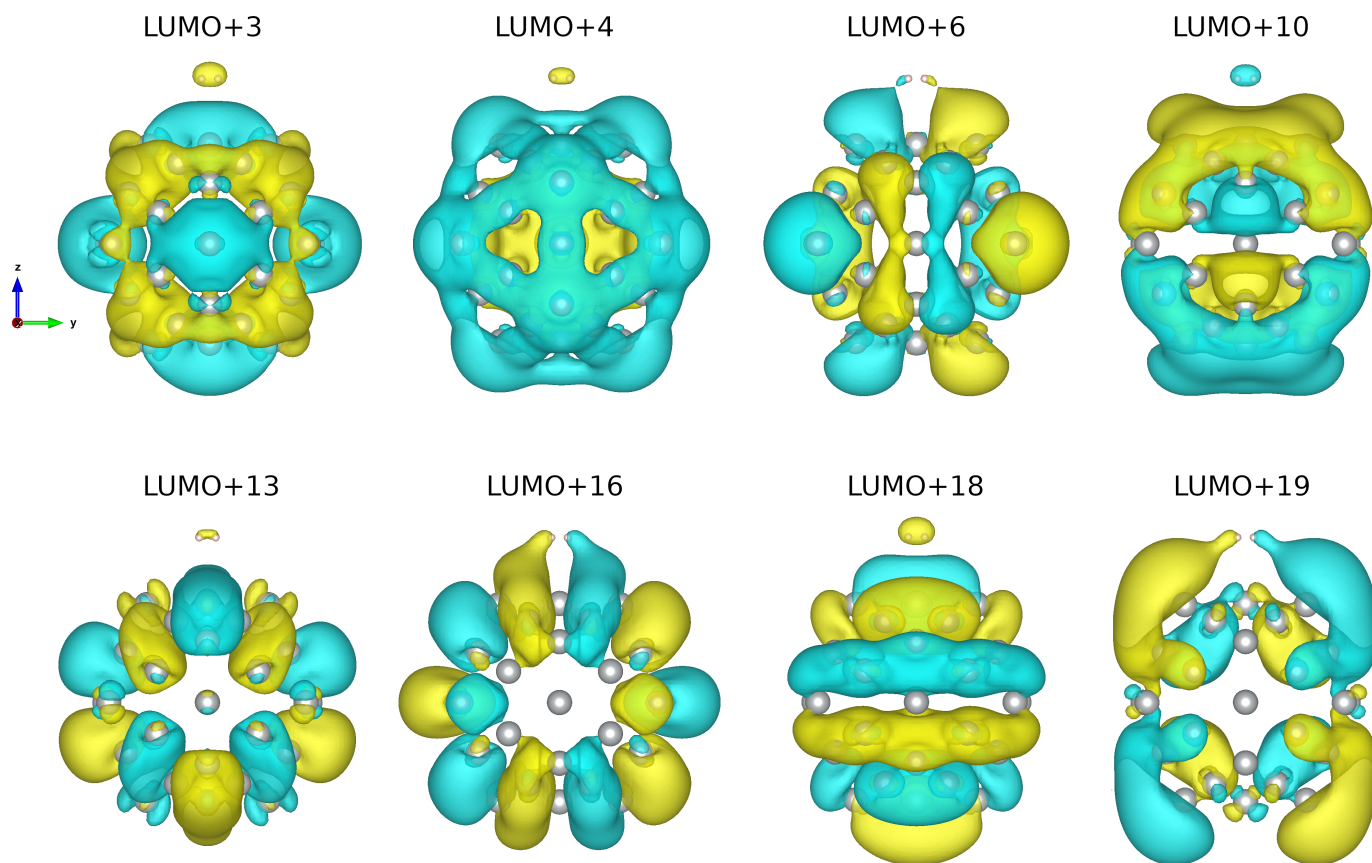

**Figure S2** Ground-state unoccupied molecular orbitals of  $\text{Ag}_{55}^{\text{L1}} + \text{H}_2$ . Orbitals LUMO+3, +4, +10, +13, and +18 have a bonding, while LUMO+6, +16, and +19 have an antibonding character on  $\text{H}_2$ .

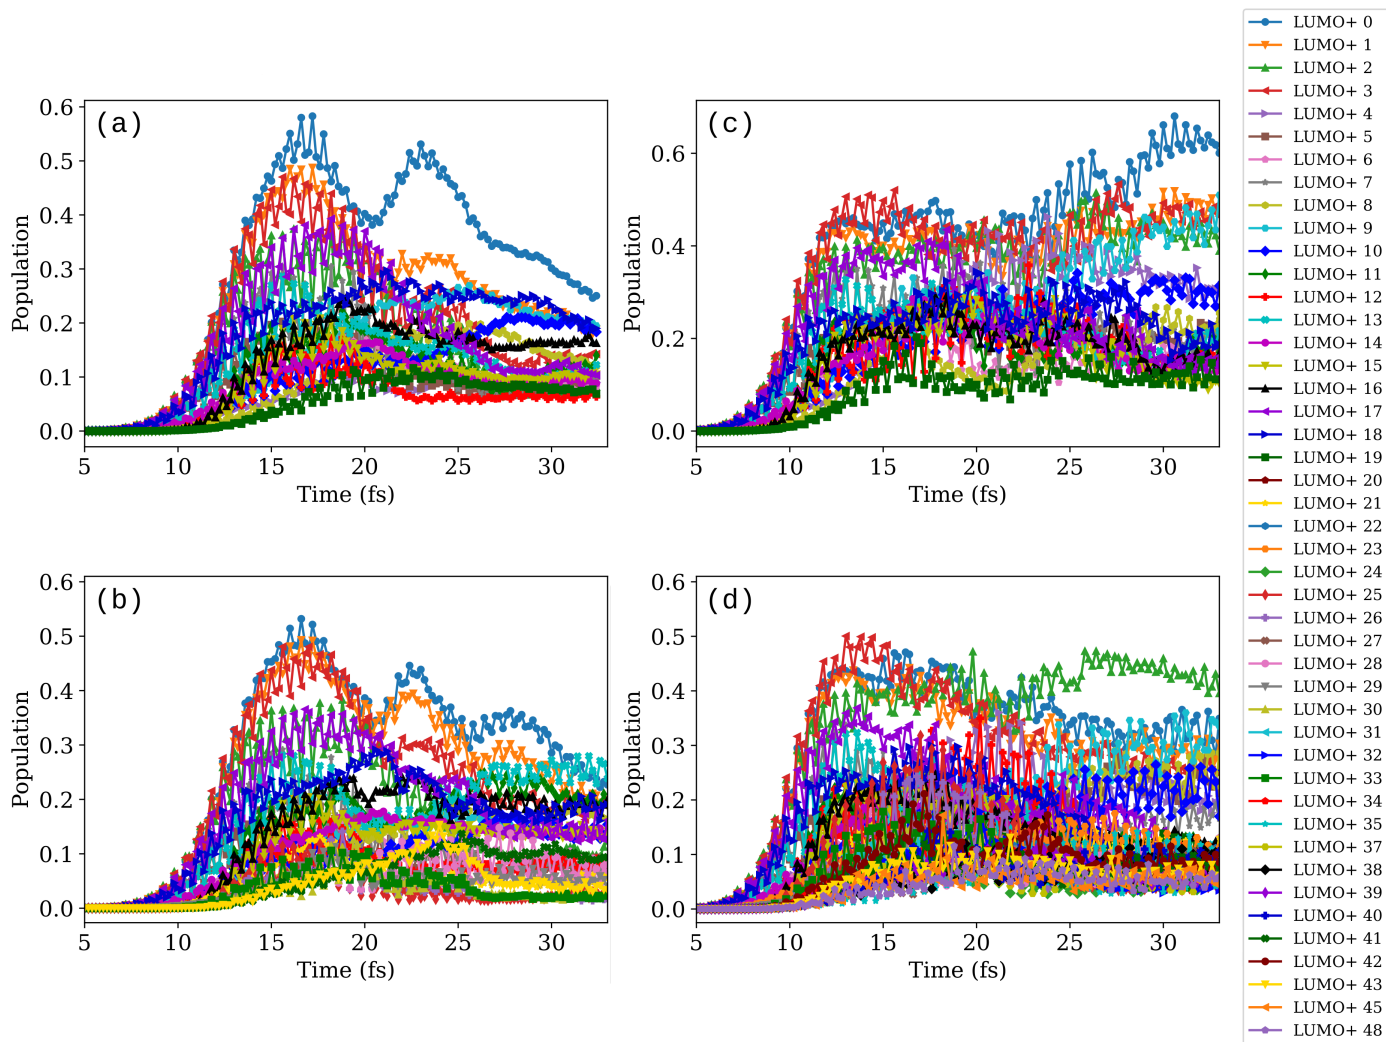

**Figure S3** Time evolution of the  $\text{Ag}_{55}^{\text{L1}}+\text{H}_2$  orbital populations induced by an external field with intensity (left panels, (a,b))  $I_{\text{max}} = 2 \times 10^{13} \text{ W/cm}^2$  and (right panels, (c,d))  $I_{\text{max}} = 1 \times 10^{14} \text{ W/cm}^2$ . (a) and (c) correspond to the case without the ghost atoms, while (b) and (d) - with the ghost atoms. The field frequency is  $\hbar\omega_0 = 3.15 \text{ eV}$ . Orbital populations are calculated every 0.2 fs as sums of the squares of the projections of the time-dependent occupied MOs on the initially unoccupied orbitals. Only populations with maximum values  $> 0.1$  are plotted.

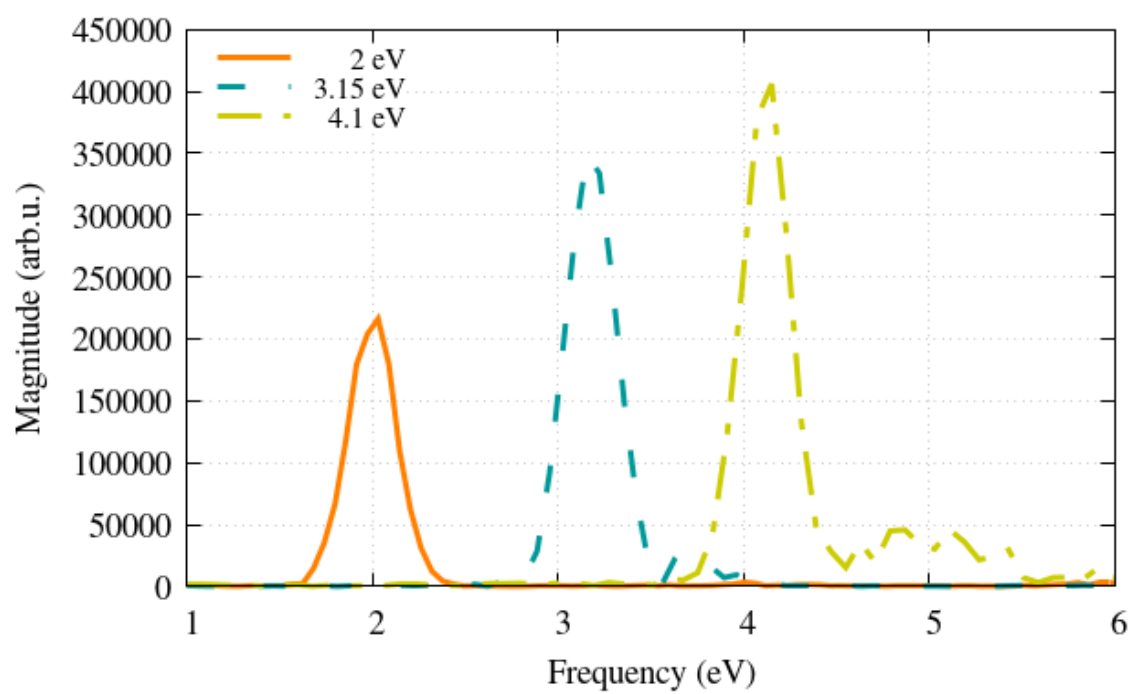

**Figure S4** Fourier transform of the time-dependent dipole moment at field intensity  $I_{\max} = 2 \times 10^{13} \text{ W/cm}^2$ .

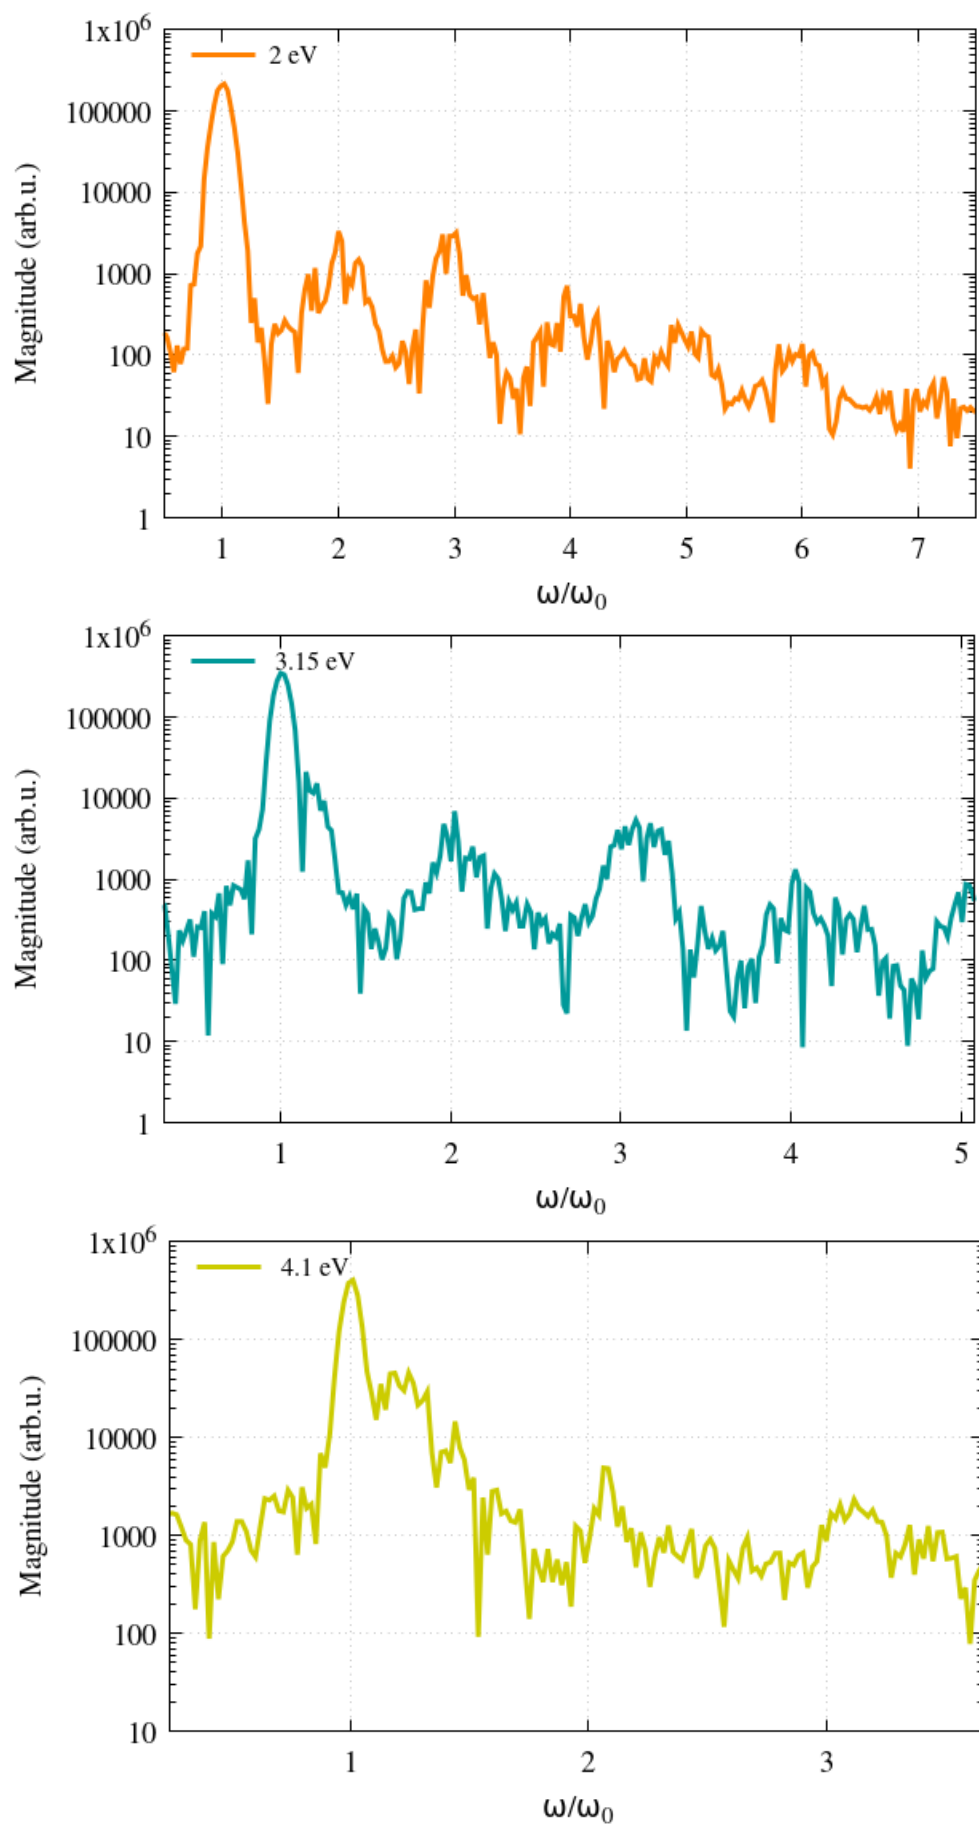

**Figure S5** Fourier transform of the time-dependent dipole moment at field intensity  $I_{\max} = 2 \times 10^{13}$  W/cm<sup>2</sup> and frequencies (a) 2 eV, (b) 3.15 eV, (c) 4.1 eV. Higher harmonics are observed on a logarithmic scale.

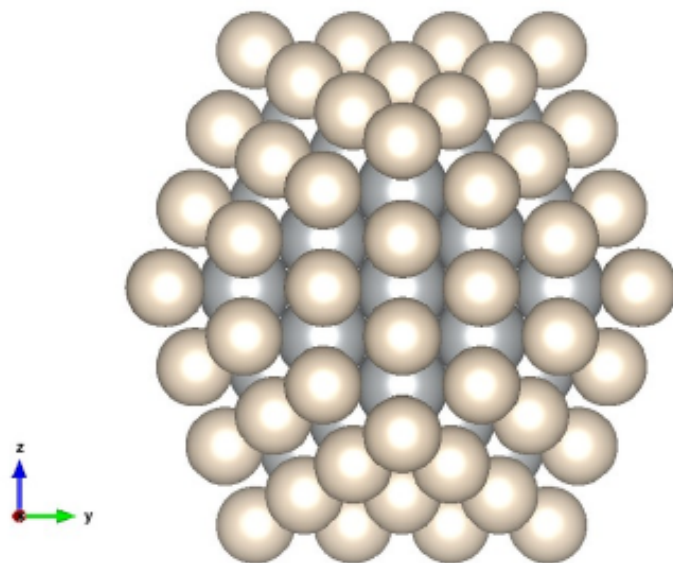

**Figure S6** Atomic structure of the  $\text{Ag}_{55}^{L1} + \text{H}_2$  surrounded by the layer of ghost atoms  $\text{Ag}_g$ . Ag atoms in grey and Ag ghost atoms in white.

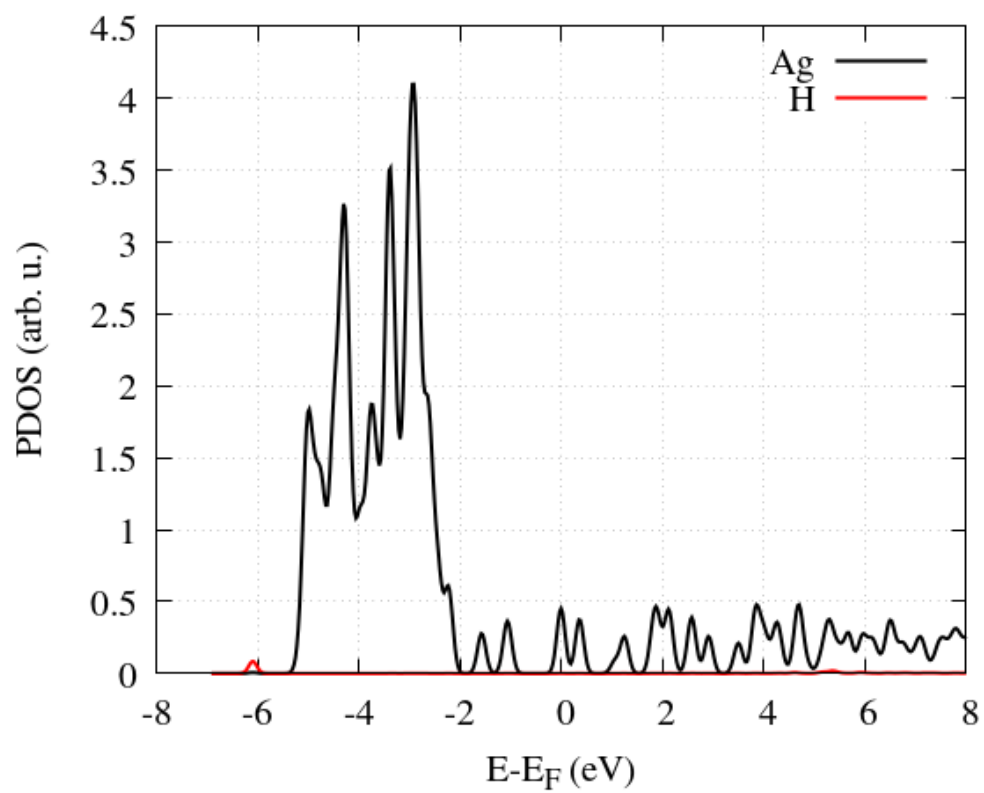

**Figure S7** PDOS of the  $\text{Ag}_{55}^{L1} + \text{H}_2$ .

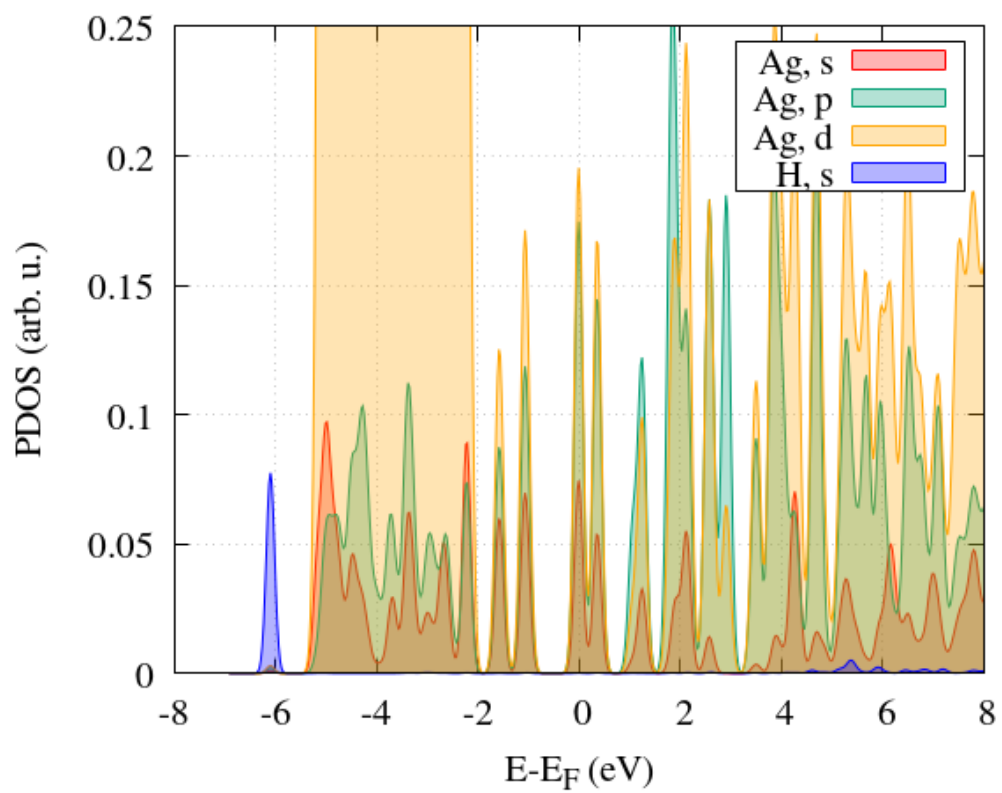

**Figure S8** Angular-momentum resolved PDOS of the  $\text{Ag}_{55}^{L1} + \text{H}_2$ . The vertical axis scale is reduced to show the small features.

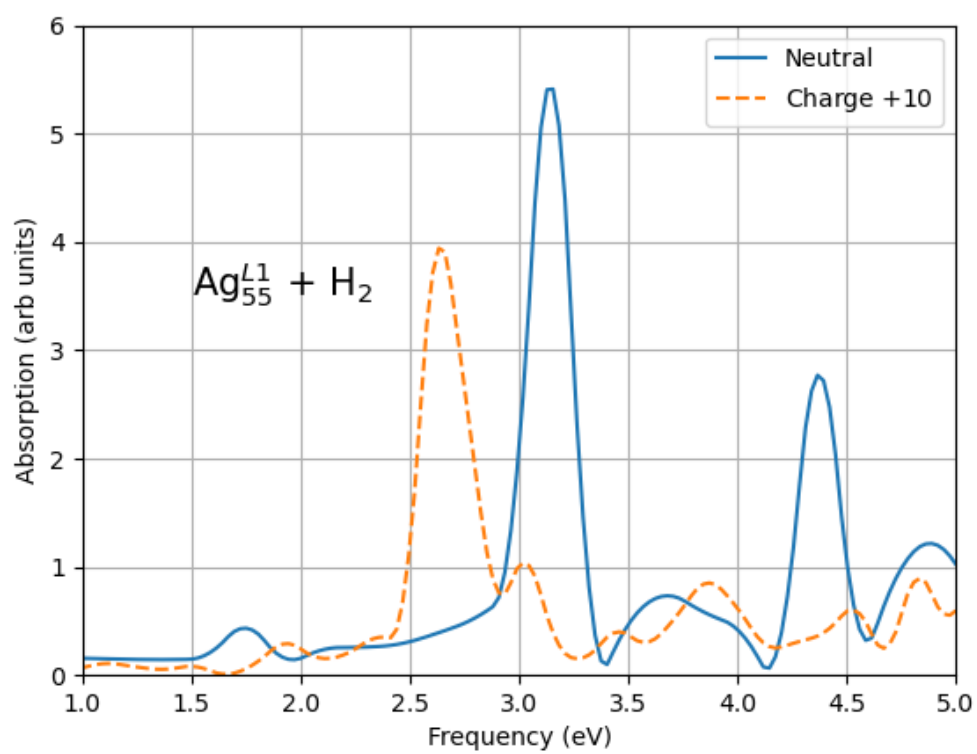

**Figure S9** Absorption spectrum for neutral and charged system  $\text{Ag}_{55}^{\text{L1}} + \text{H}_2$ .
